# Supplementary material for: N-Doped CrS2 Monolayer as a Highly-Efficient Catalyst for Oxygen Reduction Reaction: A Computational Study
Source: Nanomaterials (Basel). 2022 Aug 30;12(17):3012. doi: 10.3390/nano12173012 (PMC9458212; doi:10.3390/nano12173012)
Supplement: Supplementary file 1 [file nanomaterials-12-03012-s001.zip › nanomaterials-1845575-supplementary.pdf]

# N-Doped CrS<sub>2</sub> Monolayer as a Highly-Efficient Catalyst for Oxygen Reduction Reaction: A Computational Study

Zengming Qin <sup>1</sup>, Zhongxu Wang <sup>1</sup>, Xiaofeng Li <sup>2</sup>, Qinghai Cai <sup>2</sup>, Fengyu Li <sup>3,\*</sup> and Jingxiang Zhao <sup>1,2,\*</sup>

<sup>1</sup> Key Laboratory for Photonic and Electronic Bandgap Materials, Ministry of Education, School of Physics and Electronic Engineering, Harbin Normal University, No. 1, Shida Street, Harbin 150025, China

<sup>2</sup> College of Chemistry and Chemical Engineering, Harbin Normal University, Harbin 150025, China

<sup>3</sup> School of Physical Science and Technology, Inner Mongolia University, Hohhot 010021, China

\* Correspondence: fengyuli@imu.edu.cn (F.L.); zhaojingxiang@hrbnu.edu.cn (J.Z.)

**Table S1.** The computed the overpotentials ( $\eta^{\text{ORR}}$ , V) at various energy cutoff (eV) or k-points.

| cutoff | $\eta^{\text{ORR}}$ | k-point               | $\eta^{\text{ORR}}$ |
|--------|---------------------|-----------------------|---------------------|
| 400    | 0.43                | $2 \times 2 \times 1$ | 0.40                |
| 450    | 0.44                | $3 \times 3 \times 1$ | 0.41                |
| 500    | 0.41                | $4 \times 4 \times 1$ | 0.41                |
| 500    | 0.41                | $5 \times 5 \times 1$ | 0.41                |

**Table S2.** The computed the overpotential ( $\eta^{\text{ORR}}$ ) and the free adsorption energies ( $\Delta G$ , eV) for various X@CrS<sub>2</sub> materials.

|          | $\eta^{\text{ORR}}$ | $\Delta G_{\text{O}^*}$ | $\Delta G_{\text{OH}^*}$ | $\Delta G_{\text{OOH}^*}$ |
|----------|---------------------|-------------------------|--------------------------|---------------------------|
| pristine | 1.78                | 0.00                    | 0.55                     | 4.08                      |
| B        | 2.42                | -0.76                   | -1.19                    | 2.49                      |
| C        | 1.20                | 0.13                    | 0.10                     | 3.23                      |
| N        | 0.41                | 1.65                    | 0.82                     | 4.07                      |
| O        | 1.53                | 4.29                    | 3.01                     | 5.22                      |
| Si       | 2.82                | -0.56                   | -1.59                    | 2.21                      |
| P        | 2.18                | -0.14                   | -0.95                    | 2.74                      |
| Cl       | 1.78                | 4.04                    | 2.47                     | 5.47                      |
| As       | 0.97                | 1.45                    | 0.26                     | 3.83                      |
| Se       | 1.61                | 2.68                    | 2.40                     | 5.30                      |
| Br       | 1.74                | 3.82                    | 2.41                     | 5.43                      |

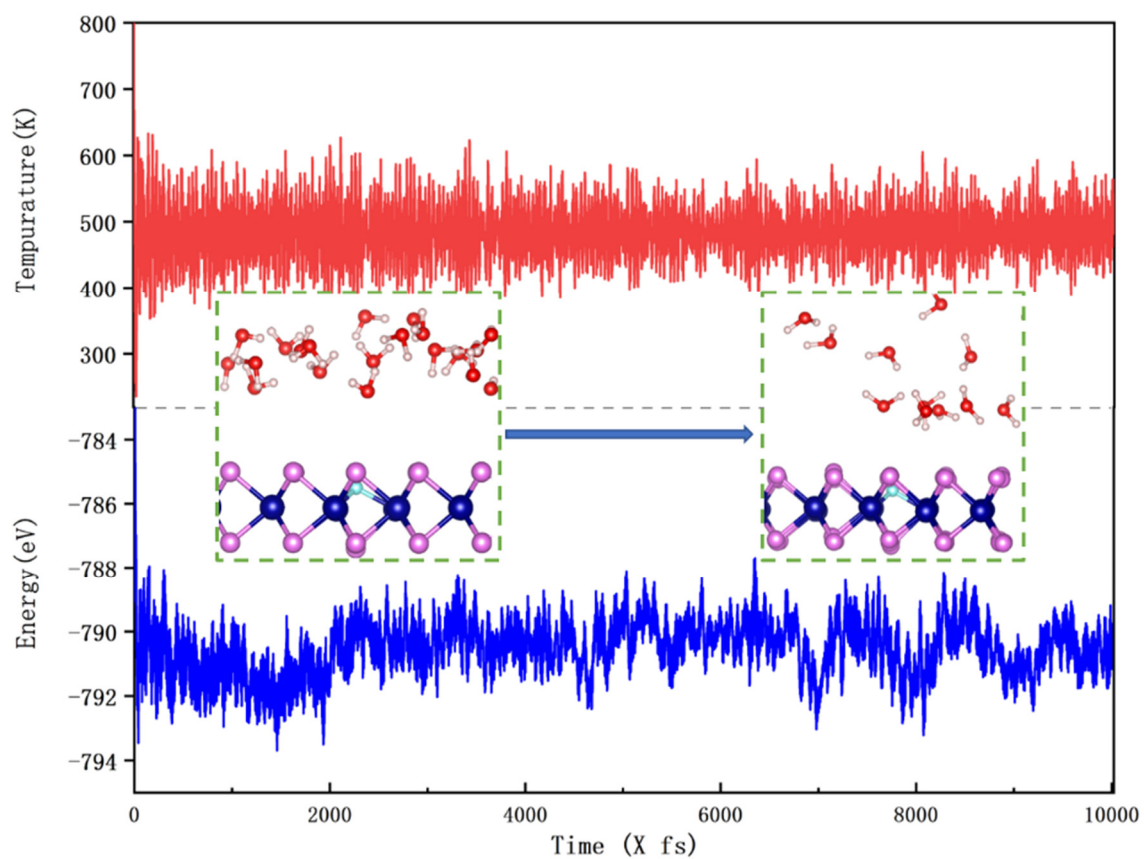

**Figure S1.** Total potential temperature and energy fluctuations after equilibration for N@CrS<sub>2</sub> in the AIMD simulation.

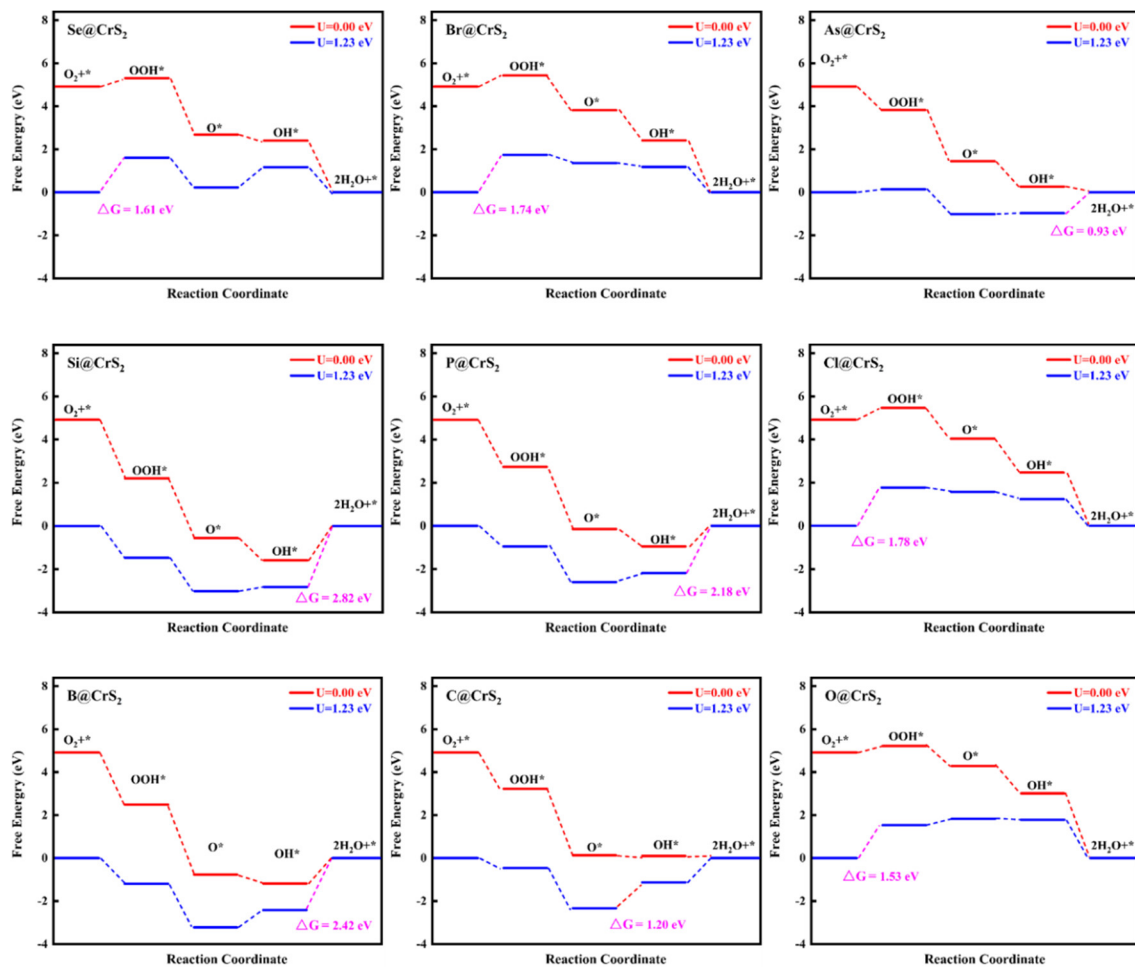

**Figure S2.** The computed free energy diagrams for ORR on different  $X@CrS_2$  systems.

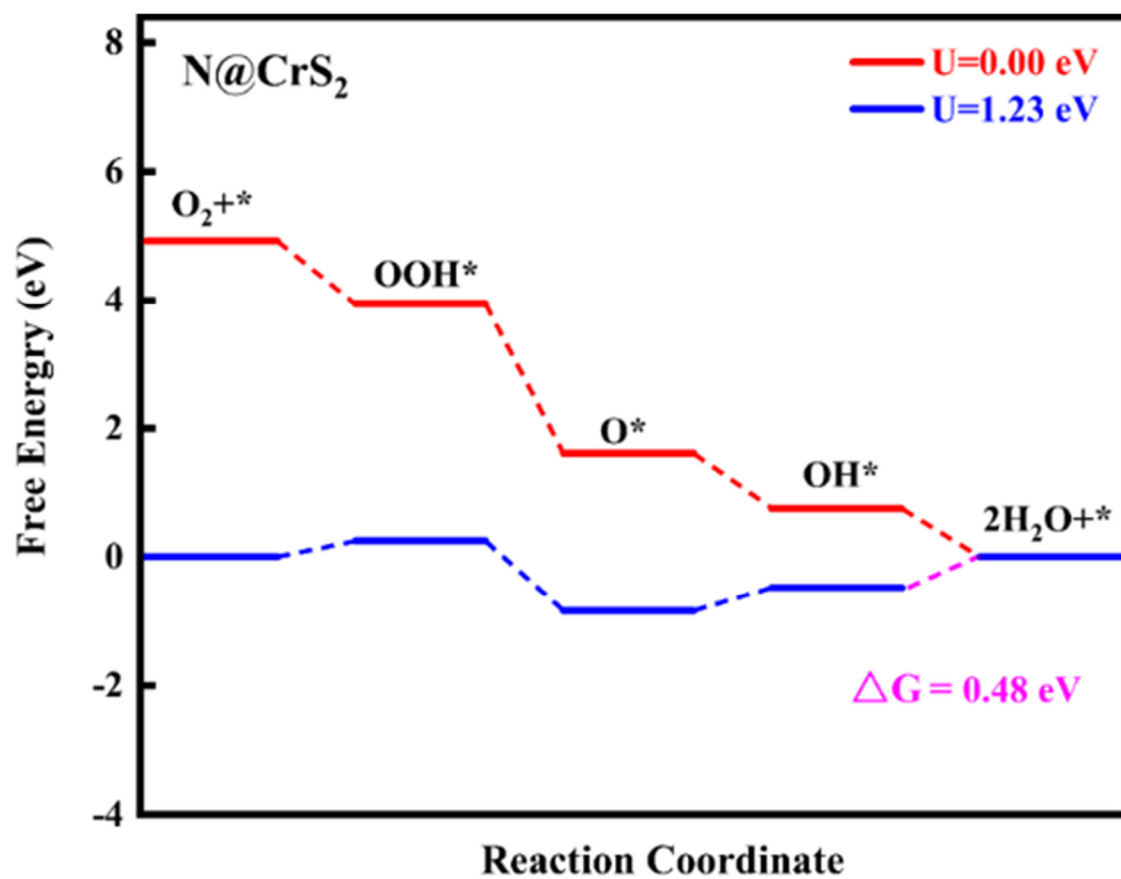

Figure S3. The computed free energy diagrams for ORR on N@CrS<sub>2</sub> with solvent effect.

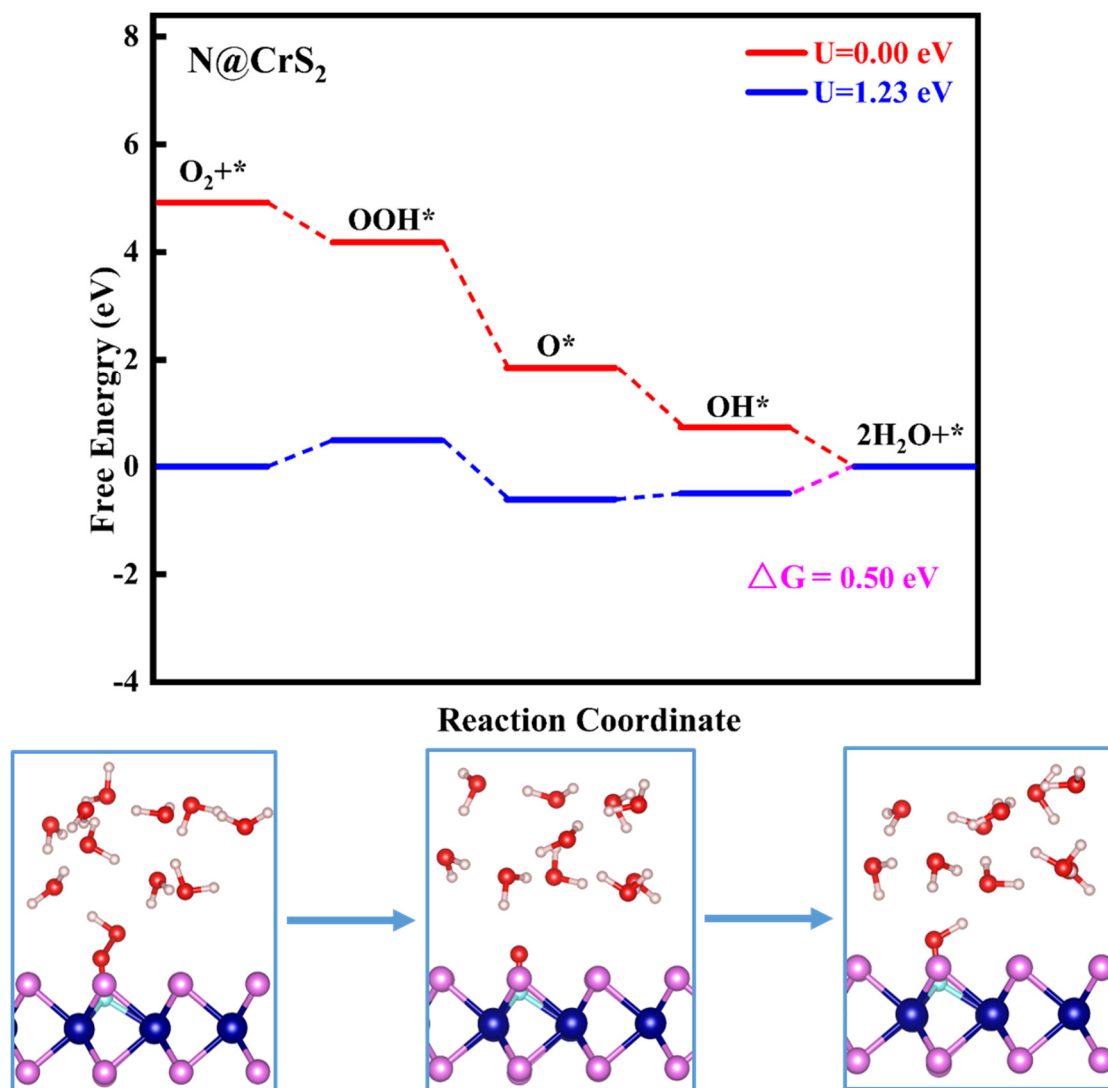

**Figure S4.** The computed free energy diagrams and the corresponding intermediates

configurations for ORR on N@CrS<sub>2</sub> with the explicit solvent models.
